# Supplementary material
Source: publisher figshare collection journal article supplement (https://future-science-group.figshare.com/ndownloader/files/31796828)
Supplement: Supplementary file 1 [file 31796828]

## Sheet: Página2
		Opioids				NSAIDs				Combo			Others									Medication Usage
	Patient #	Tramadol	Tylex (codeine, paracetamol)	Codeine	methadone	Ibuprofen	Ketorolac	Dipirona/Novalgina (metamizole)	Piroxicam	Mioflex**	Dorflex**	Revange (tramadol, paracetamol)	acetaminophen	Velija (duloxetine)	amitriptyline	nortriptyline	carbamazepine	pregabalin	gabapentin	baclofen	naltrexone	Before: Non-opioids	Before: Opioids		After: Non-opioids	After: Opioids
	1	X					X			X												2	1		1	0
	2	X						X														1	1		1	0
	3										X											1	0		0	0
	4	X												X								2	1		1	1
	5	X				X																1	1		1	0
	6	X													X							1	1		1	0
	7										X											1	0		1	0
	8	X						X														1	1		1	0
	9	X									X											1	1		1	0
	10	X						X														1	1		1	1
	11							X														1	0		1	0
	12		X					X														1	1		1	1
	13	X				X									X							2	1		1	0
	14		X			X					X											2	1		1	0
	15	X				X			X													2	1		0	0
	16	X																X				1	1		0	0
	17	X				X																1	1		1	0
	18	X				X																1	1		1	0
	19	X																X				1	1		1	0
	20							X														1	0		1	0
	21					X						X						X				2	1		1	1
	22	X																				0	1		0	0
	23																					0	0		0	0
	24	1						1											1			2	1		1	1
	25					X						X						X				2	1		1	0
	26																	X			X	1	1		1	0
	27	X						X														1	1		0	0
	28	X						X										X				2	1		1	0
	29	X																X				1	1		0	0
	30	X						X										X				2	1		1	1
	31	X						X										X				2	1		1	0
	32	X						X										X				2	1		1	0
	33		X					X														1	1		1	1
	34							X								X						2	0		2	0
	35	X											X					X				2	1		2	1
	36			X															X			1	1		1	0
	37		X		X									X			X	X				1	3		1	2
	38													X								1	0		1	0
	39	X																X	X			3	1		2	0
	40													X	X					X		3	0		2	n/a
	41	X												X	X							2	1		2	1
	42	X											X					X				2	1		1	1
	43			X				X					X									2	1		1	1
	44*																					n/a	n/a		n/a	n/a
	45*																					n/a	n/a		n/a	n/a
	46*																					n/a	n/a		n/a	n/a
	* Data not available for 3 patients
	**Combination drugs
		Mioflex - carisoprodol + cafeina (caffeine) + diclofenac
		Dorflex - dipirona monoidrata (dipyrone monohydrate), citrato de orefenadirna (orphenadrine citrate), cafeina anidra (anhydrous caffiene)
